# Supplementary material
Source: PubMed Central journal article supplement (PMC6254358)
Supplement: supp_RA118.004273_138570_2_supp_208116_pfjx2n.pdf [file supp_RA118.004273_138570_2_supp_208116_pfjx2n.pdf]

**A**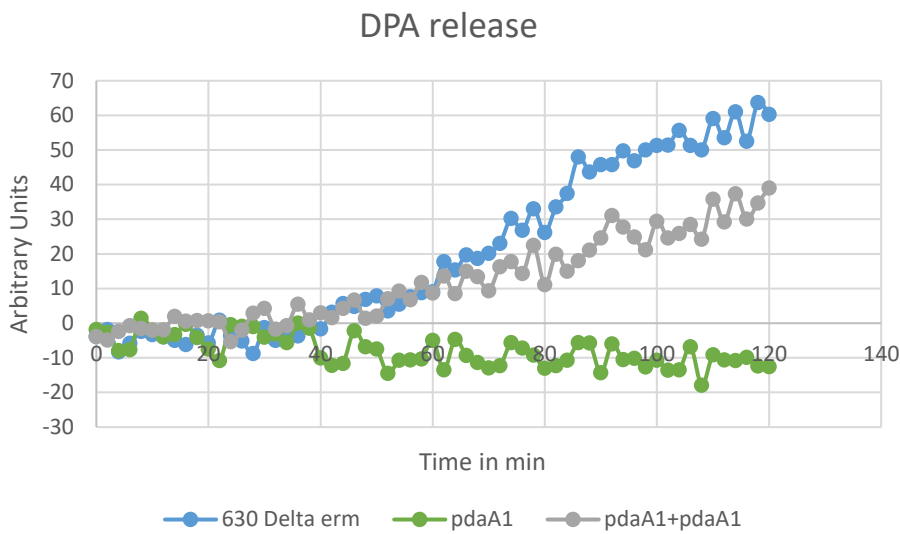**B**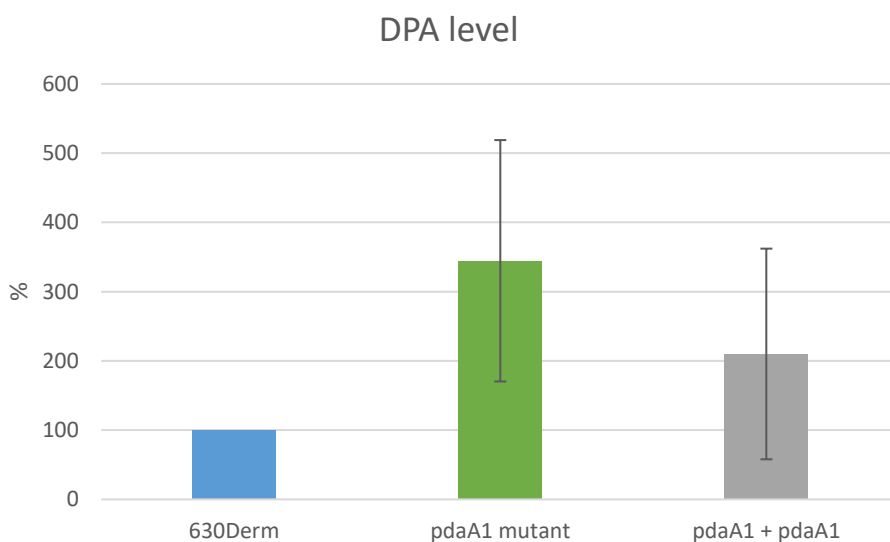**Figure S1.** DPA release during germination and quantification of DPA contents of spores

Kinetics of DPA release after germination induction for spore suspensions of the strains 630 $\Delta$ erm(pMTL84151) in blue,  $\Delta$ pdaA1(pMTL84151) in green, and the complemented strain  $\Delta$ pdaA1(pCH67) in gray in response to germinant (A). Total DPA amount of the parental (630 $\Delta$ erm), the pdaA1 mutant (pdaA1 mutant) and the complemented mutant spores (pdaA1+pdaA1) (B). The average of DPA for the parental strain was normalized at 100% and the DPA level of the mutant and complemented strains were presented as ratios relative to the parental.

DPA was measured by fluorescence, according to the protocol described in Donnelly et al. with the following difference,  $2.5 \times 10^7$  spores were used in the terbium release assay. Fluorescence was measured using the spectrofluorometer SAFAS FLX-Xenius.

Reference:

Donnelly, M. L., Fimlaid, K. A., and Shen, A. (2016) Characterization of *Clostridium difficile* Spores Lacking Either SpoVAC or Dipicolinic Acid Synthetase. *Journal of bacteriology* **198**, 1694-1707

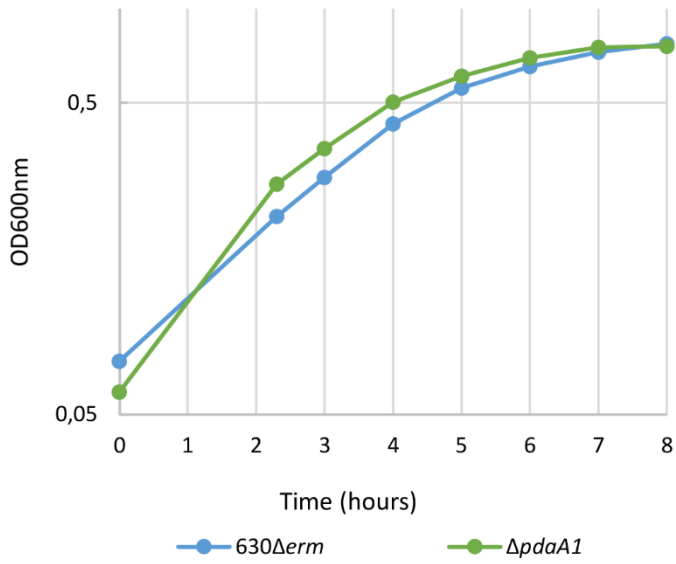

**Figure S2.** The *pdaA1* mutant and parental strains have a similar growth curve. Exponential growth curve of the *pdaA1* mutant (green) and parental strain (blue) in BHI broth.

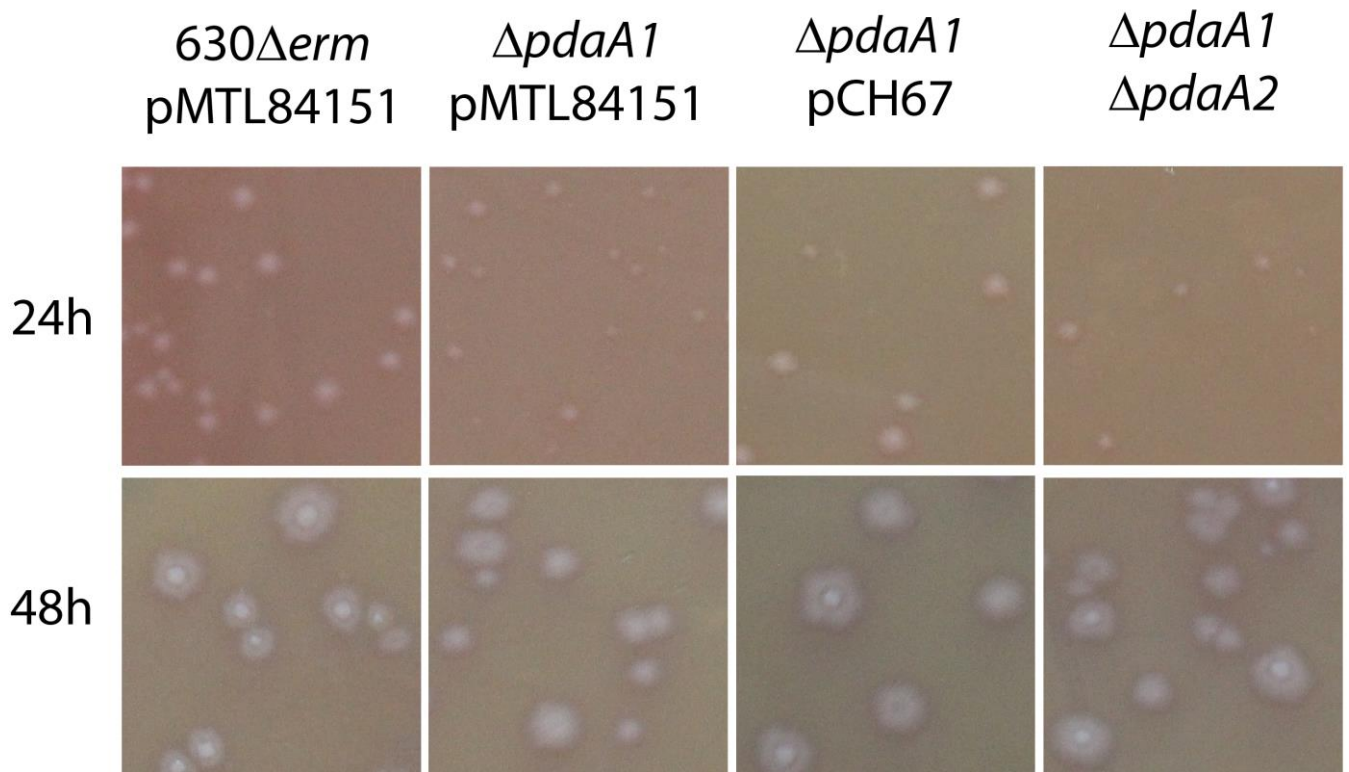

**Figure S3.** Additional germination assays in solid medium

Assessment of germination delay in solid BHI supplemented with horse blood and taurocholates was performed for the 630 $\Delta$ *erm*(pMTL84151) parental strain, the  $\Delta$ *pdaA1*(pMTL84151) mutant, the  $\Delta$ *pdaA1*(pCH67) complemented strain, and the  $\Delta$ *pdaA1*  $\Delta$ *pdaA2* double mutant. Pictures are magnified at the same level, and they are representative of three independent experiments.

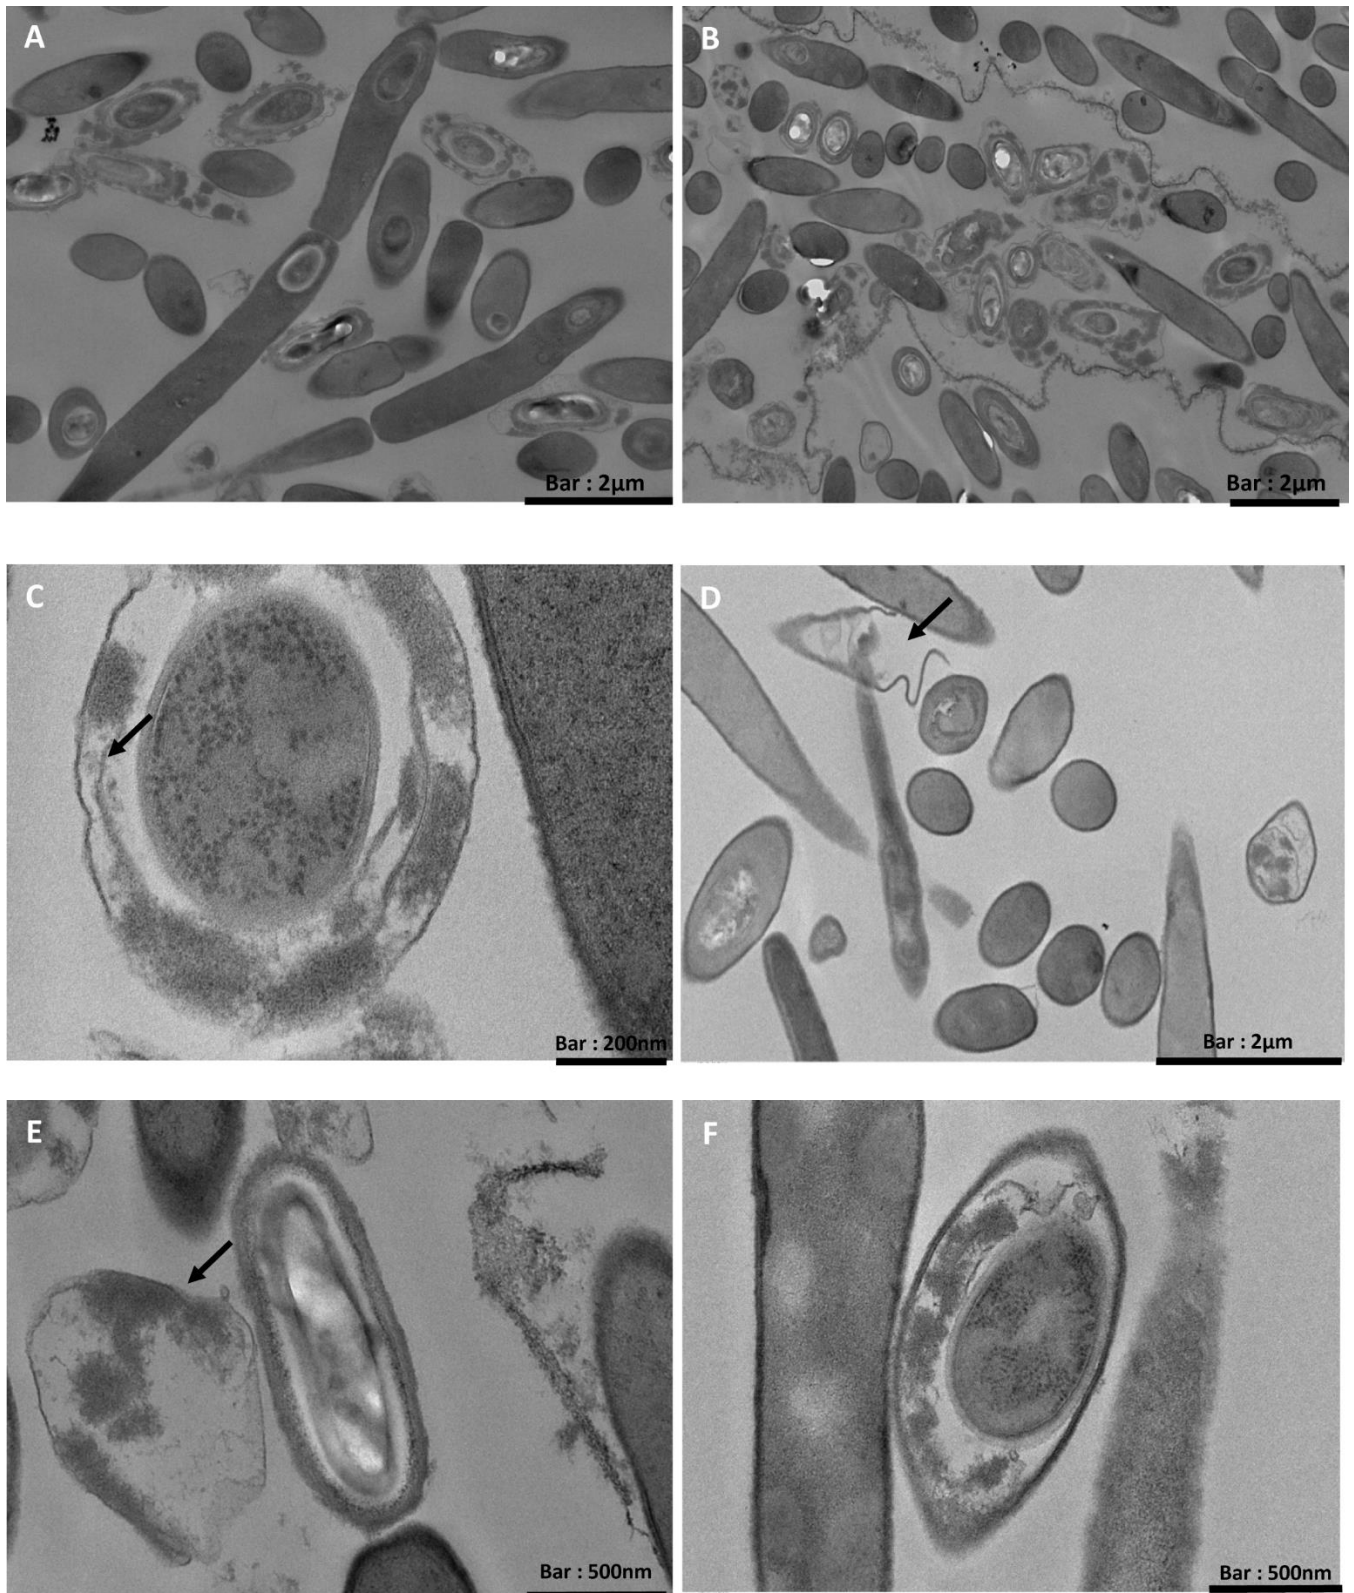

**Figure S4.** Additional TEM analysis

Global observation for the 630 $\Delta$ erm (A) and  $\Delta$ pda1 strains (B). Additional abnormal morphology in  $\Delta$ pda1 endospore TEM analysis (C to F). Black arrows shows detached external structures.

**630Δerm****ΔpdaA1**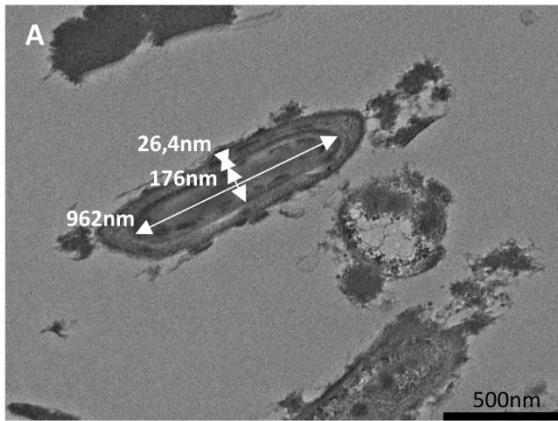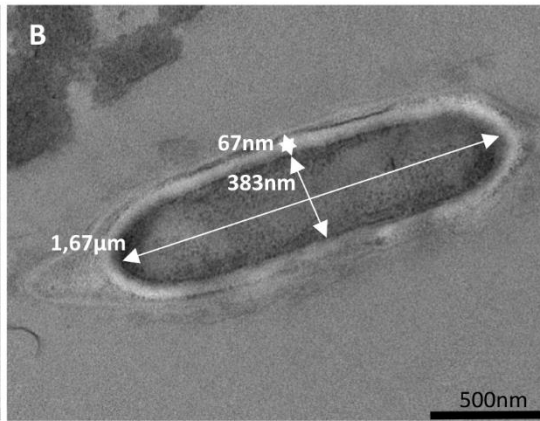**Longitudinal section**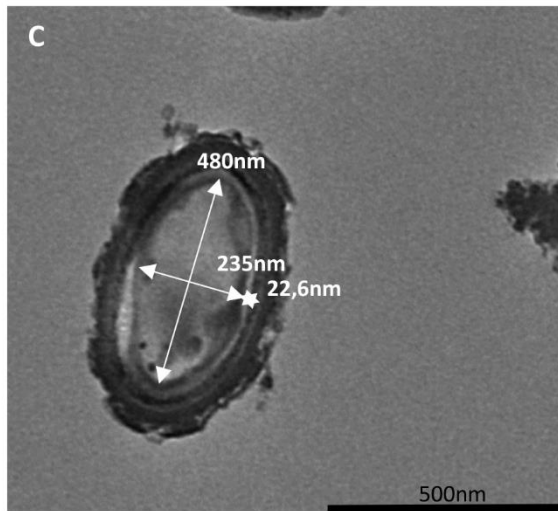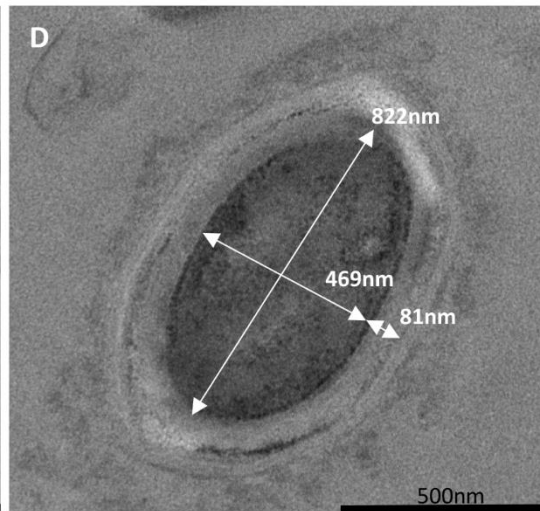**Transversal section**

| Spore                   |         | Core length<br>nm          | Core width<br>nm         | Cortex<br>thickness<br>nm | Core volume<br>nm <sup>3</sup> | Sporoplast<br>volume<br>nm <sup>3</sup> | P/S ratio             |
|-------------------------|---------|----------------------------|--------------------------|---------------------------|--------------------------------|-----------------------------------------|-----------------------|
| Longitudinal<br>section | 630Δerm | 912,90<br>± 179,13         | 230,60<br>± 39,60        | 34,17<br>± 12,80          | 2,08E+08<br>± 7,64E+07         | 2,83E+08<br>± 9,67E+07                  | 0,73<br>± 0,08        |
|                         | ΔpdaA1  | <b>1122,00</b><br>± 213,53 | <b>392,20</b><br>± 49,22 | <b>74,54</b><br>± 13,63   | <b>7,39E+08</b><br>± 2,31E+08  | <b>1,11E+09</b><br>± 3,02E+08           | <b>0,66</b><br>± 0,06 |
| Transversal<br>section  | 630Δerm | 455,80<br>± 92,51          | 276,90<br>± 73,30        | 36,85<br>± 13,03          | 1,69E+08<br>± 1,35E+08         | 2,31E+08<br>± 1,68E+08                  | 0,72<br>± 0,07        |
|                         | ΔpdaA1  | <b>583,70</b><br>± 179,06  | <b>418,70</b><br>± 66,80 | <b>70,60</b><br>± 12,22   | <b>4,63E+08</b><br>± 2,11E+08  | <b>6,98E+08</b><br>± 2,91E+08           | <b>0,65</b><br>± 0,07 |
| Average                 | 630Δerm | 684,35<br>± 269,37         | 253,75<br>± 63,29        | 35,51<br>± 12,98          | 1,89E+08<br>± 1,12E+08         | 2,57E+08<br>± 1,39E+08                  | 0,73<br>± 0,08        |
|                         | ΔpdaA1  | <b>852,85</b><br>± 333,57  | <b>405,45</b><br>± 60,15 | <b>72,57</b><br>± 13,09   | <b>6,01E+08</b><br>± 2,61E+08  | <b>9,03E+08</b><br>± 3,61E+08           | <b>0,65</b><br>± 0,07 |

**Figure S5.** TEM spore measurements

TEM images of *C. difficile* spore cross sections. Representative images of spores are shown in each panel, for the parental strain (A and C) and the *pdaA1* mutant (B and D). The scale is indicated in the bottom left corner of each image. Full measure results are detailed in the table: longitudinal and transversal values are averages of 10 measurement each  $\pm$  standard deviation. The protoplast volume (core) and sporoplast volume (core and cortex) were calculated according to Beaman *et al.*:  $\text{volume} = (4/3) \pi (\text{width}/2) X 2 X (\text{length}/2)$  (57). The protoplast-to-sporoplast (P/S) ratio was calculated by dividing the calculated core volume (protoplast) by the volume of the core plus cortex layer (sporoplast). Bold data indicate significant difference compared to the parental strain (Student test,  $p < 0.05$ ).

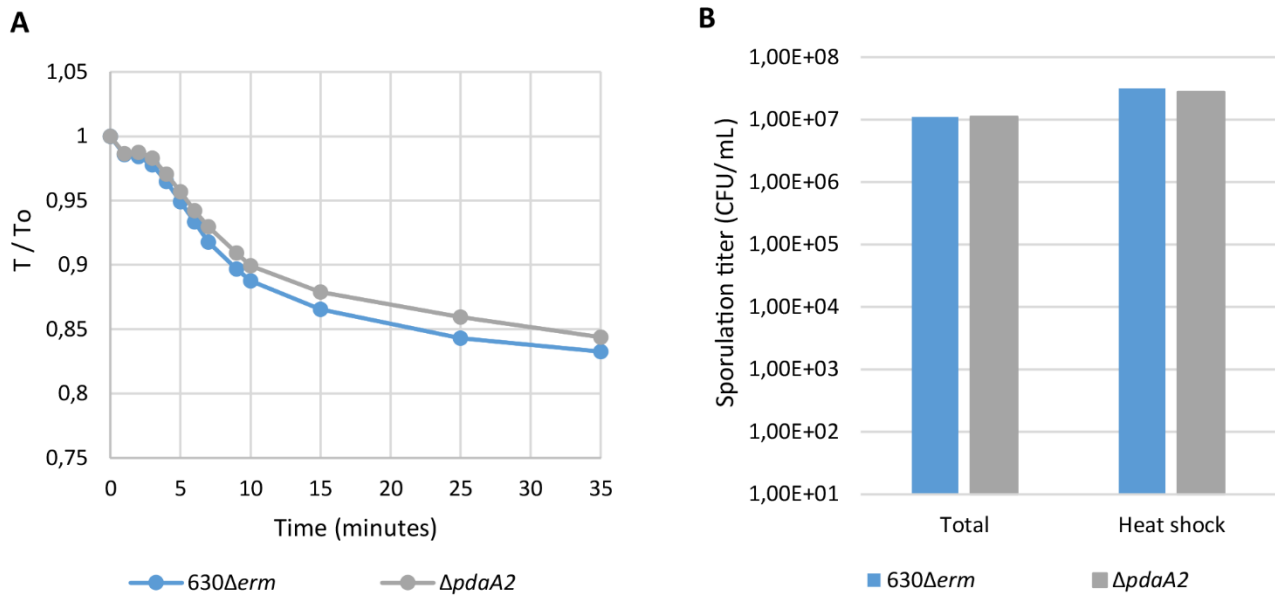

**Figure S6.** *pdaA2* mutant has similar germination and sporulation compared to the parental strain. Germination assay by optical density monitoring (A). OD<sub>600nm</sub> observed at time point (T); initial OD<sub>600nm</sub> at T=0 (To). Quantification of sporulation titers after 72h incubation in SM broth (B), for the 630Δ*erm* parental strain in blue and *pdaA2* mutant (CD630\_27190) in grey.

| Parameters                      |                  | 630 $\Delta$ erm | $\Delta$ 630_14300 | $\Delta$ CD630_27190 | $\Delta$ CD14300<br>$\Delta$ CD27190 |
|---------------------------------|------------------|------------------|--------------------|----------------------|--------------------------------------|
| Cross-linking                   | monomers         | 90,23            | 93,80              | 89,78                | 85,33                                |
|                                 | dimers           | 9,77             | 6,20               | 10,22                | 14,67                                |
|                                 | trimers          | 0,00             | 0,00               | 0,00                 | 0,00                                 |
|                                 | cross-link       | 4,89             | 3,10               | 5,11                 | 7,33                                 |
| Side chains (% of muropeptides) | none             | 21,92            | 55,35              | 25,16                | 30,67                                |
|                                 | dipeptide        | 5,78             | 8,17               | 7,01                 | 6,59                                 |
|                                 | tripeptide       | 4,83             | 2,79               | 5,49                 | 8,67                                 |
|                                 | tetrapeptide     | 43,52            | 33,30              | 40,61                | 54,08                                |
|                                 | muramic-lactam   | 23,96            | 0,40               | 21,73                | 0,00                                 |
| Saccharide chains               | disaccharides    | 45,85            | 42,57              | 48,11                | 54,54                                |
|                                 | tetrasaccharides | 52,26            | 40,30              | 48,90                | 40,10                                |
|                                 | hexasaccharides  | 1,80             | 11,57              | 2,85                 | 3,93                                 |
|                                 | octasaccharides  | 0,10             | 5,56               | 0,14                 | 1,43                                 |
| N-deacetylation                 | N-deacetylated   | 54,73            | 51,85              | 49,15                | 57,65                                |
|                                 | Acetylated       | 45,27            | 48,15              | 50,85                | 42,35                                |

**Table S2.** Cortex parameters of the 630 $\Delta$ erm, the *pdaA1* mutant ( $\Delta$ 630\_14300) and the *pdaA2* mutant ( $\Delta$ CD630\_27190) strains. The cross-linking index was calculated with the formula  $(1/2\Sigma\text{dimers} + 2/3\Sigma\text{trimers})/\Sigma$  all muropeptides (61).



| <b>Identity matrix</b>            | PdaA<br><i>B. subtilis</i> | PdaA<br><i>B. thuringiensis</i> | CD630_1430<br><i>C. difficile</i> | CD630_27190<br><i>C. difficile</i> |
|-----------------------------------|----------------------------|---------------------------------|-----------------------------------|------------------------------------|
| PdaA<br><i>B. subtilis</i>        | 100                        | 52.33                           | 36.72                             | 34.66                              |
| PdaA<br><i>B. thuringiensis</i>   | 52.33                      | 100                             | 34.5                              | 39.53                              |
| CD630_1430<br><i>C. difficile</i> | 36.72                      | 34.5                            | 100                               | 40.67                              |
| CD630_2719<br><i>C. difficile</i> | 34.66                      | 39.53                           | 40.67                             | 100                                |

**Table S3.** Identity matrix of PdaA proteins

Identity matrix of protein sequences of PdaA from *B. subtilis*, PdaA from *B. thuringiensis*, CD630\_14300 and CD630\_27190 from *C. difficile*, obtained from ClustalW multiple sequence alignment (28).

**Cortex purification and analysis yields**

|                                  | <b>Freeze-dried spores</b> | <b>Freeze-dried muropeptides</b> | <b>Total peaks area</b> |
|----------------------------------|----------------------------|----------------------------------|-------------------------|
| <b>630<math>\Delta</math>erm</b> | 5,0mg                      | 2,0mg                            | 2,25E+09                |
| <b><math>\Delta</math>pdA</b>    | 5,3mg                      | 2,0mg                            | 1,17E+10                |

**Table S5.** Cortex analysis yields

| Name  | 5' Sequence                     | 3' Sequence                     | Use                                                    |
|-------|---------------------------------|---------------------------------|--------------------------------------------------------|
| M13F  | /                               | tgtaaacgacggccagt               | Cloning screening                                      |
| M13R  | /                               | caggaaacagctatgacc              | Cloning screening                                      |
| TC157 | /                               | gcagccagaagccatcgattacaaacgttg  | Cloning screening                                      |
| 7315A | /                               | CCCGGGTACCGAGCTCGAATTCGCCCTTTA  | pMTLSC7315 amplification                               |
| 7315B | /                               | GATCCTCTAGAGTCGACGTCACGCGTCCATG |                                                        |
| HC174 | taaagggcgaattcgagctcggtaccggg   | GACCCAAAGAATCTAACACATTTGG       | <i>CD630_14300</i> deletion – DNA amplification        |
| HC175 | CTATAAATATTCAAATATATTATAAG      | tatcataaatttaaaaaactctatcatg    |                                                        |
| HC176 | catgatagagtttttaaatatgata       | CTATAATATAGTTTGAATATTATAG       |                                                        |
| HC177 | catggacgcgtgacgtcgactctagaggatc | CATATTTAGTACATAAATAATTAGTAAG    |                                                        |
| HC178 | /                               | GCTTCCAGTCTATCTATACAAATATAG     | <i>CD630_14300</i> deletion – mutant screening         |
| HC179 | /                               | CCTTTGATTATGTCATGTACAATTC       |                                                        |
| HC254 | gaattcgagctc                    | CCTTGACAGCTC                    | <i>CD630_14300</i> complementation – DNA amplification |
| HC272 | /                               | CTCTATCGAGAATTAAGTATT           |                                                        |
| HC185 | taaagggcgaattcgagctcggtaccggg   | TCCCGTCAATTCCTTTGAGTTTCA        | <i>CD630_27190</i> deletion - DNA amplification        |
| HC186 | CCAATTATAATAACTATATATGC         | tattataattacatctaaagtcta        |                                                        |
| HC187 | tagacttagatgtaattataaata        | GCATATAGTATTATTATAATTGG         |                                                        |
| HC188 | catggacgcgtgacgtcgactctagaggatc | CAGCTGGTGCAGCAGGTGTTGCAGTATC    |                                                        |
| HC189 | /                               | GGTAAGGTTCTTCGCGTTGCTTCG        | <i>CD630_27190</i> deletion - mutant screening         |
| HC190 | /                               | TCATGGTCTTGCCTTATCTACAGAC       |                                                        |

**Table S6.** Primers
